# Supplementary material for: Removal of methylene blue from wastewater under a low power irradiation source by Zn, Mn co-doped TiO2 photocatalysts
Source: Royal Society of Chemistry journal article supplement (doi:10.1039/c5ra19353b), 2015-01-01
Supplement: c5ra19353b1.pdf [file c5ra19353b1.pdf]

# Removal of methylene blue from waste water under low power irradiation source by Zn, Mn co-doped TiO<sub>2</sub> photocatalyst

Poonam Benjwal<sup>a</sup> and Kamal K. Kar<sup>a, b, \*</sup>

<sup>a</sup>Advanced Nanoengineering Materials laboratory, Materials Science Programme,

Indian Institute of Technology Kanpur, Kanpur-208016, India,

<sup>b</sup>Advanced Nanoengineering Materials laboratory, Department of Mechanical

Engineering, Indian Institute of Technology Kanpur, Kanpur-208016, India

Email: [kamalkk@iitk.ac.in](mailto:kamalkk@iitk.ac.in), Fax # 0512-2597408, Phone # +91-512-2597687

**\*Corresponding author**

---

Kamal K. Kar

<sup>a</sup>Advanced Nanoengineering Materials Laboratory, Materials Science Programme, Indian Institute of Technology Kanpur, Kanpur 208016, India,

<sup>b</sup>Advanced Nanoengineering Materials Laboratory, Department of Mechanical Engineering, Indian Institute of Technology Kanpur, Kanpur 208016, IndiaE-mail address:

[kamalkk@iitk.ac.in](mailto:kamalkk@iitk.ac.in) (Kamal.K.Kar) . Fax: +91 512 2597408

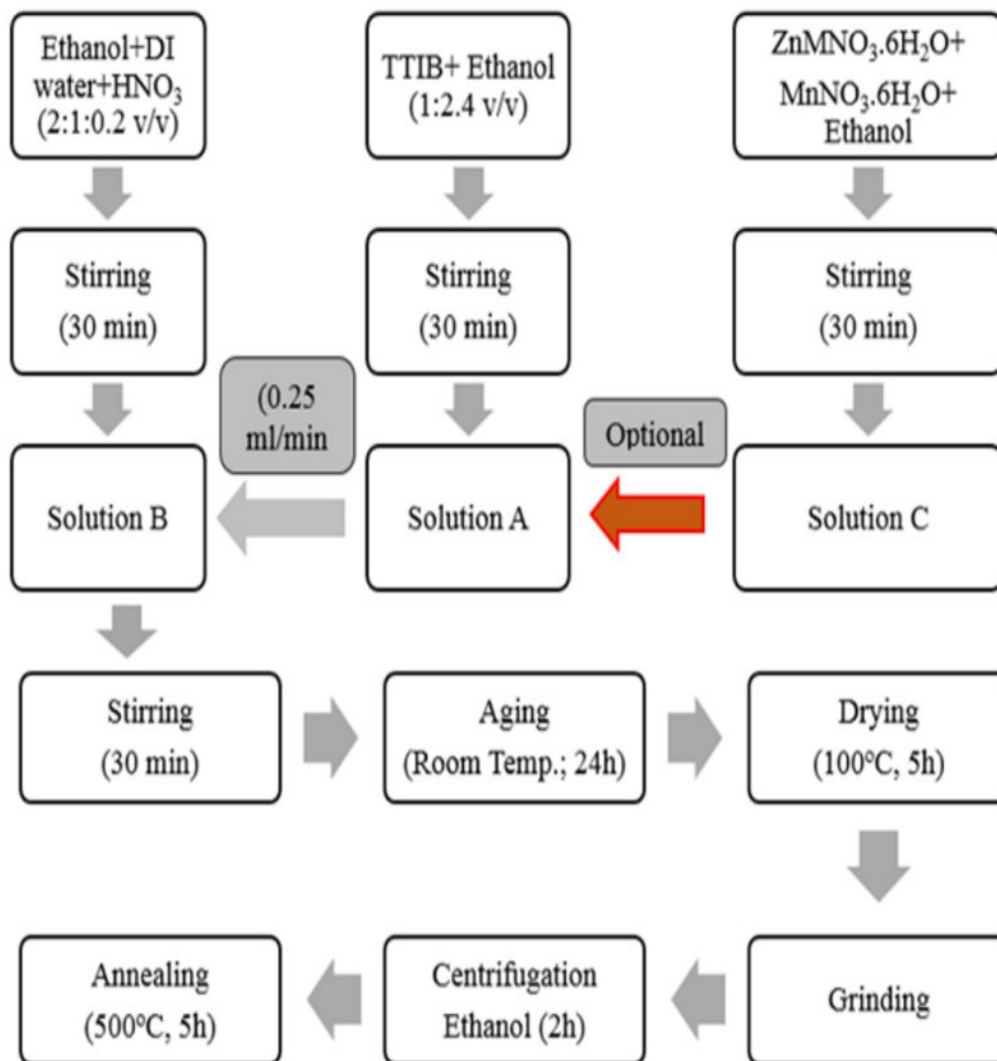

**Fig. S1** Flow chart for the sol-gel synthesis of TiO<sub>2</sub> nanoparticles

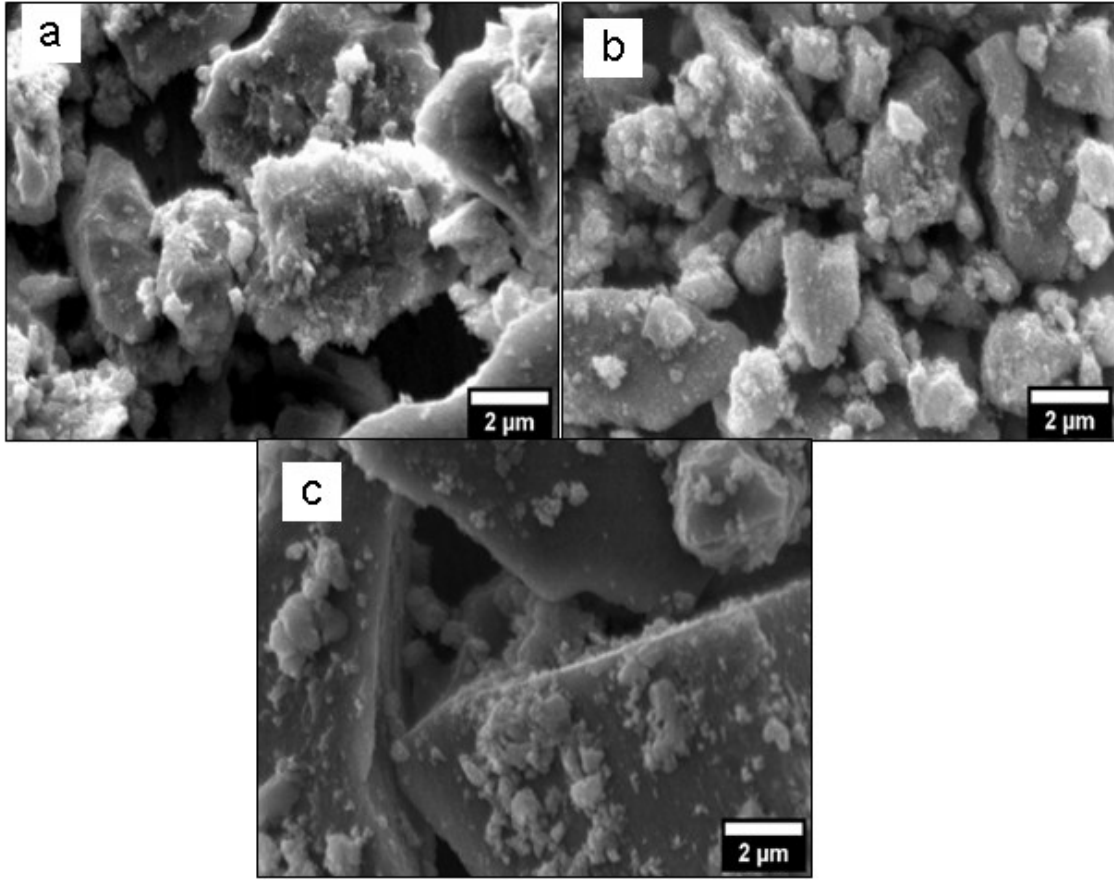

**g. S2.** SEM images of (a) TP0 (b) TP1 and (c) TP2

**S1.** The whole mechanism of the MB degradation in presence of visible light over TiO<sub>2</sub> can be explained by the following photocatalytic reactions

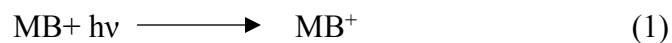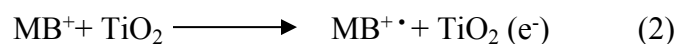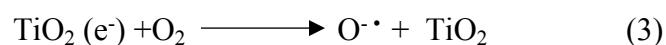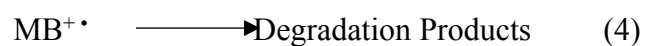

The MB molecules can be completely degraded by these redox chain of reaction. In this photosensitization process, the presence of TiO<sub>2</sub> is very essential as it plays a very efficient role of electro transfer to electro acceptor [1]. Thus, it can be said that in presence of visible light, the degradation of MB dye over blank TiO<sub>2</sub> is occurred due to the photosensitization process.

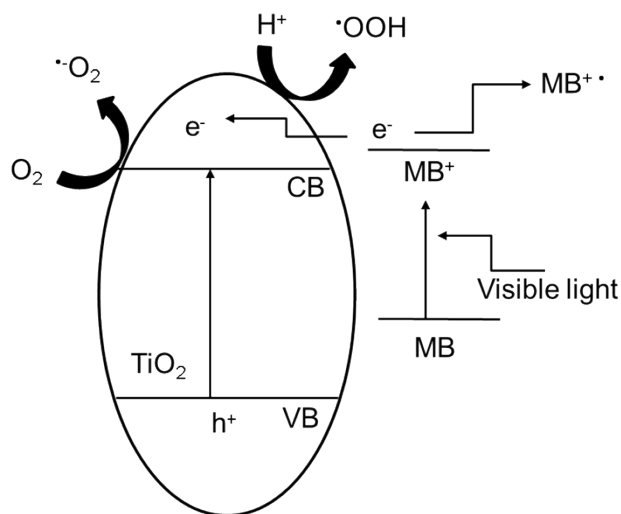

**Fig. S3:** Photocatalytic mechanism of TiO<sub>2</sub> under Visible Light Illumination

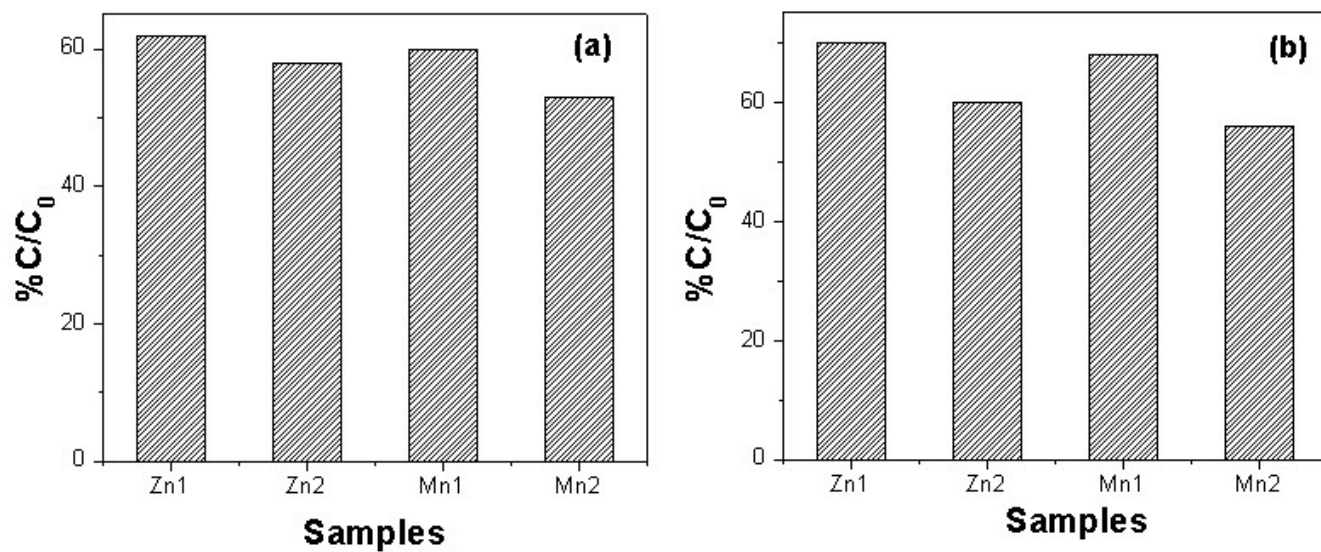

**Fig. S4.** Photocatalytic degradation of MB degradation in 10 hours by single Zn and Mn doped (1.0, 2.0 at.%) in presence of (a) visible light and (b) UV light.

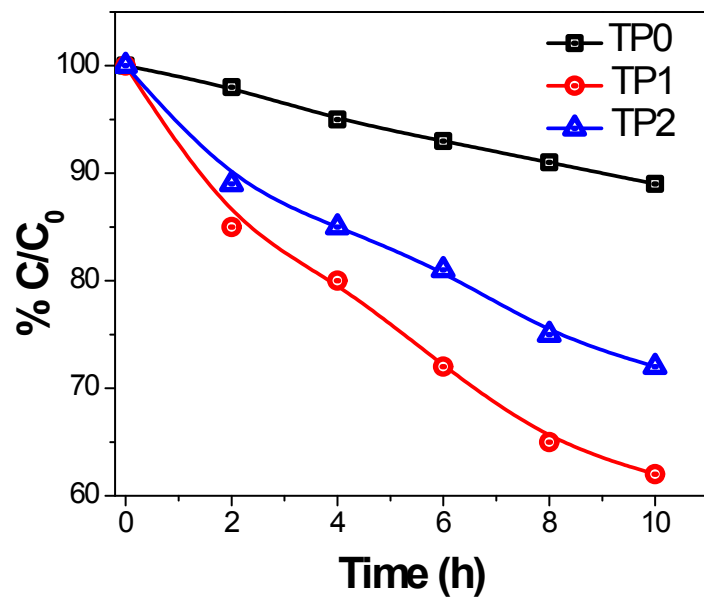

**Fig. S5.** The photocatalytic degradation of phenol over TP0, TP1 and TP2 under visible light irradiation.

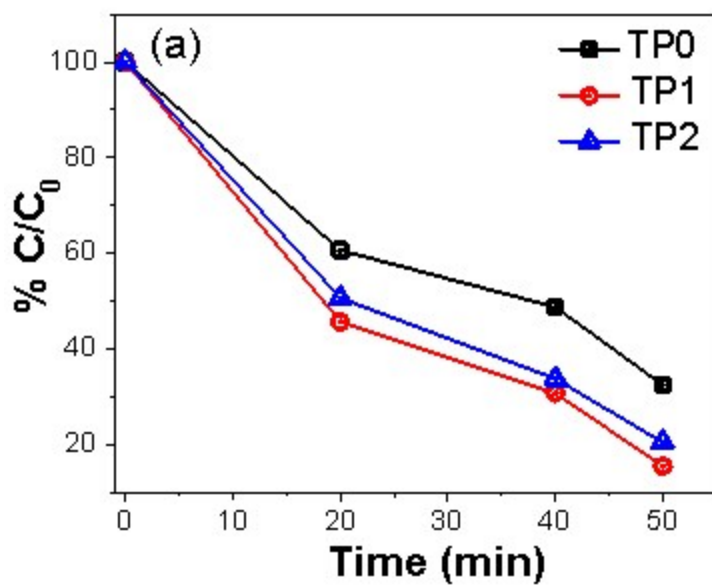

**Fig. S6.** Comparison of relative concentration of undoped and co-doped TiO<sub>2</sub> under the presence of high power 450W solar visible light source.

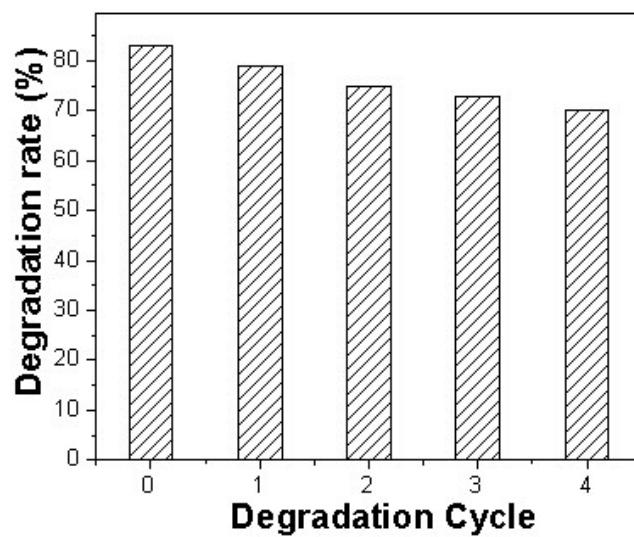

**Fig. S7.** Bar plot showing the degradation of MB dye for 4 cycle using TP1 catalyst in presence of visible light.



**Table S1:** Comparison of UV and visible radiation in terms of % degradations for 10 h and the rate constants.

| Substrate              | Samples | Rate constant<br>(visible) $k$ ( $\text{h}^{-1}$ ) | Rate constant<br>(UV) $k$ ( $\text{h}^{-1}$ ) |
|------------------------|---------|----------------------------------------------------|-----------------------------------------------|
| Methylene<br>blue (MB) | TP0     | 0.06                                               | 0.07                                          |
|                        | TP1     | 0.12                                               | 0.13                                          |
|                        | TP2     | 0.10                                               | 0.11                                          |

**Table S2:** Comparison of visible light degradation efficiencies ( $\Phi$ ) of various TiO<sub>2</sub> photocatalysts doped with different transition metal dopants from literature to that of the present study.

| Dopant concentration in TiO <sub>2</sub> (at.%) | Dye            | Degradation time (t; min) | Intensity of visible irradiation source (L <sub>0</sub> ; Watt) | Maximum degradation (1-C/C <sub>0</sub> ; S) | Degradation/ Watt min ( $\Phi$ )= (S / I <sub>0</sub> × t) × 10 <sup>-5</sup> |
|-------------------------------------------------|----------------|---------------------------|-----------------------------------------------------------------|----------------------------------------------|-------------------------------------------------------------------------------|
| Zn <sup>2+</sup> (0.37 )                        | RhB*           | 30                        | Halogen bulb-1000W                                              | 0.99                                         | ~3.0 [2]                                                                      |
| Mn <sup>2+</sup> (0.2)                          | MB             | 360                       | Philips Bulb-300W                                               | 0.90                                         | ~ 0.8 [3]                                                                     |
| Pt <sup>2+</sup> (0.3)                          | Phenol         | 180                       | Hg(Xe) Bulb-500 W                                               | 0.9                                          | ~1 [4]                                                                        |
| Fe <sup>3+</sup> (0.1)                          | MB             | 180                       | Xenon Bulb-450W                                                 | 0.65                                         | ~ 0.248 [5]                                                                   |
| N                                               | MB             | 160                       | Xenon Bulb-150 W                                                | 0.9                                          | ~ 37.5 [6]                                                                    |
| Fe + N (0.5)                                    | RhB*           | 240                       | Halogen Bulb-1000W                                              | 0.99                                         | ~ 0.41 [7]                                                                    |
| Cu+N (0.9, 3.1 )                                | Xylenol Orange | 40                        | Hg Bulbe-500W                                                   | 0.5                                          | ~ 2.5 [8]                                                                     |
| Fe+ B (2.8, 19 )                                | Toluene        | 360                       | Halogen Bulb-150W                                               | 0.8                                          | ~ 1.4 [9]                                                                     |
| Zn+Mn (1.0, 1.0)                                | MB             | 600                       | LED Bulbs-2W                                                    | 0.8                                          | ~ 66.6 (Present study)                                                        |

CR\* = Chromophore, RhB\* = Rhodamine B,

## References:

- [1] T. Wu, G. Liu, J. Zhao, H. Hidaka and N. Serpone, *J. Phys. Chem. B*, 1998, **102**, 5845-5851.
- [2] Y. Zhao, C. Li, X. Liu, F. Gu, H. Du and L. Shi, *Appl. Catal., B*, 2008, **79**, 208-215.
- [3] Q. R. Deng, X. H. Xia, M. L. Guo, Y. Gao and G. Shao, *Mater. Lett.*, 2011, **65**, 2051-2054.
- [4] J. Choi, H. Park and M. R. Hoffmann, *J. Phys. Chem. C*, 2009, **114**, 783-792.
- [5] J. Zhu, J. Ren, Y. Huo, Z. Bian and H. Li, *J. Phys. Chem. C*, 2007, **111**, 18965-18969.
- [6] Y. Zhao, X. Qiu and C. Burda, *Chem. Mater.*, 2008, **20**, 2629-2636.
- [7] Y. Cong, J. Zhang, F. Chen, M. Anpo and D. He, *J. Phys. Chem. C*, 2007, **111**, 10618-10623.
- [8] K. Song, J. Zhou, J. Bao and Y. Feng, *J. Am. Ceram. Soc.*, 2008, **91**, 1369-1371.
- [9] R. Khan, S. W. Kim, T.-J. Kim and C.-M. Nam, *Mater. Chem. Phys.*, 2008, **112**, 167-172.
